# Supplementary material
Source: HighWire-hosted journal article supplement (https://www.jpn.ca/highwire/filestream/89374/field_highwire_adjunct_files/0/jpn-190038-1-at.pdf)
Supplement: jpn-190038-1-at.pdf [file jpn-190038-1-at.pdf]

**Appendix 1** to Gürsel, D, Reinholz L, Bremer B, et al. frontoparietal and salience network alterations in obsessive–compulsive disorder: insights from independent component and sliding time window analyses. *J Psychiatry Neurosci* 2020.

DOI: 10.1503/jpn.190038

Copyright © 2020 The Author(s) or their employer(s). To receive this resource in an accessible format, please contact us at [cmajgroup@cmaj.ca](mailto:cmajgroup@cmaj.ca).

*Online appendices are unedited and posted as supplied by the authors.*

**Supplementary material for:**

*‘Frontoparietal and Salience Network Alterations in Obsessive- Compulsive Disorder: Insights from independent component and sliding time window analyses’*

from Gürsel et al.

**Contents:**

Table S1: Details of pharmacological treatment characteristics of obsessive-compulsive disorder patients.

Figure S1: Plot of correlation values for significant network pairs for all time windows

**Appendix 1** to Gürsel, D, Reinholz L, Bremer B, et al. frontoparietal and salience network alterations in obsessive–compulsive disorder: insights from independent component and sliding time window analyses. *J Psychiatry Neurosci* 2020.

DOI: 10.1503/jpn.190038

*Online appendices are unedited and posted as supplied by the authors.*

**Table S1: Details of pharmacological treatment characteristics of obsessive-compulsive disorder patients.**

| Pharmacological Treatment         | N (%)     |
|-----------------------------------|-----------|
| Medication free                   | 18 (36.7) |
| SSRI (20-200mg/d)                 | 21 (42.8) |
| SSRI combinations                 | 3 (6.1)   |
| TeCA (15-40mg/d)                  | 2 (4.08)  |
| TCA (25-100mg/d)                  | 2 (4.08)  |
| SSRI combined with antipsychotics | 3 (6.1)   |

**Appendix 1** to Gürsel, D, Reinholz L, Bremer B, et al. frontoparietal and salience network alterations in obsessive–compulsive disorder: insights from independent component and sliding time window analyses. *J Psychiatry Neurosci* 2020.

DOI: 10.1503/jpn.190038

*Online appendices are unedited and posted as supplied by the authors.*

**Figure S1: Plot of correlation values for significant network pairs for all time windows**

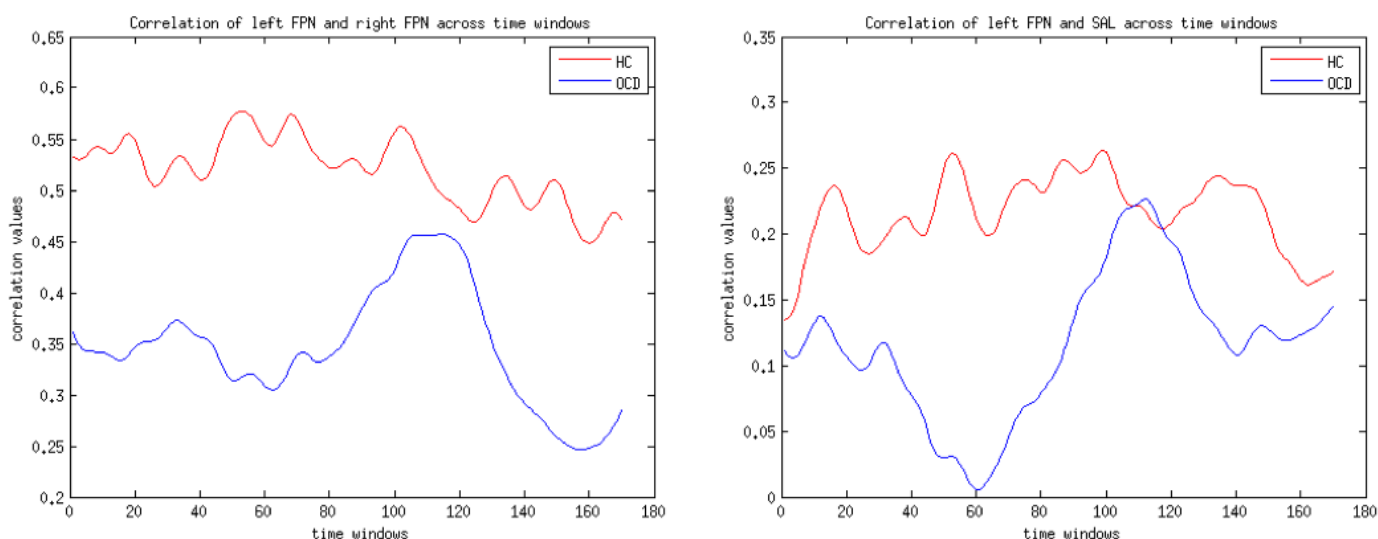

**Figure S1.** Correlation plots for sliding time window results over time windows. Left panel shows correlation values plotted for all time windows for left and right FPN. Right panel shows correlation values plotted for all time windows for left FPN and SAL. Red line indicates correlation values for healthy controls, whereas blue line indicates correlation values for OCD patients.
